Taxonomic Description template

1                    ***Escherichia ruysiae* sp. nov., isolated from an**  
2                    **international traveller**

3  
4 Boas C.L. van der Putten<sup>1,2#</sup>, S. Matamoros<sup>1</sup>, D.R. Mende<sup>3</sup>, COMBAT consortium<sup>†</sup>, C. Schultsz<sup>1,2</sup>

5 <sup>1</sup>Department of Medical Microbiology, Amsterdam UMC, University of Amsterdam, the Netherlands

6 <sup>2</sup>Department of Global Health, Amsterdam Institute for Global Health and Development, Amsterdam  
7 UMC, University of Amsterdam, the Netherlands

8 <sup>3</sup>Department of Applied Evolutionary Biology, Amsterdam UMC, University of Amsterdam, the  
9 Netherlands

10

11 #Corresponding author, email address: [boas.vanderputten@amsterdamumc.nl](mailto:boas.vanderputten@amsterdamumc.nl)

12 †Members listed in supplementary file 1

13

14 Keywords: *Escherichia*, bacterial taxonomy, Enterobacteriaceae

15

16 **ABSTRACT**

17 The *Escherichia* genus comprises four species and at least five lineages currently not assigned to any  
18 species, termed '*Escherichia* cryptic clades'. We isolated an *Escherichia* strain from an international  
19 traveller and resolved the complete DNA sequence of the chromosome and an IncI multi-drug  
20 resistance plasmid using Illumina and Nanopore whole-genome sequencing (WGS). Strain OPT1704<sup>T</sup>  
21 can be differentiated from existing *Escherichia* spp. using biochemical (VITEK2) and genomic tests  
22 (average nucleotide identity [ANI] and digital DNA:DNA hybridisation [dDDH]). Phylogenetic analysis  
23 based on alignment of 16S rRNA sequences and 682 concatenated core genes showed similar  
24 results. Our analysis further revealed that strain OPT1704<sup>T</sup> falls within *Escherichia* cryptic clade IV,  
25 and is closely related to cryptic clade III. Combining our analyses with publicly available WGS data of

26 cryptic clades III and IV from Enterobase confirmed the close relationship between clades III and IV  
27 (>96% interclade ANI), warranting assignment of both clades to the same novel species. We propose  
28 *E. ruysiae* sp. nov. as a novel species, encompassing *Escherichia* cryptic clades III and IV (type strain  
29 OPT1704<sup>T</sup> = NCCB 100732<sup>T</sup> = NCTC 14359<sup>T</sup>).

30

## 31 Author notes

32 The Genbank accession number for the 16S rRNA gene sequence of strain OPT1704<sup>T</sup> is LR745848.

33 The Genbank accession number for the complete genome sequence of strain OPT1704<sup>T</sup> is

34 CABVLQ000000000.

35

## 36 Introduction

37 Within the *Escherichia* genus, four species are recognized; *E. coli* (1), *E. fergusonii* (2), *E. albertii* (3)

38 and most recently, *E. marmotae* (4). Several species were assigned to the *Escherichia* genus

39 previously, but have now been moved to other genera, such as *E. vulneris* (now *Pseudoescherichia*

40 *vulneris* (5)), *E. blattae* (now *Shimwellia blattae* (6)), *E. adecarboxylata* (now *Leclercia*

41 *adecarboxylata* (7)) and *E. hermannii* (now *Atlantibacter hermannii* (8)). All four *Escherichia* species

42 have been associated with the potential to cause animal and/or human disease (9–12). Several

43 *Escherichia* strains cannot be assigned to any of the four existing species. Based on analysis of

44 genetic data, these strains cluster into several groups, which were termed ‘*Escherichia* cryptic clades’

45 (13,14). Recently, cryptic clade V was formally recognized as a separate species (*E. marmotae*),

46 leaving five cryptic clades that have not been delineated at the species level. Here we report the

47 novel species *Escherichia ruysiae* sp. nov., isolated from faecal material of an international traveller.

48 *Escherichia ruysiae* sp. nov. encompasses the closely related *Escherichia* cryptic clades III and IV.

49

## 50 Isolation and Ecology

51 We discovered a cryptic clade IV strain in our collection, previously identified as extended spectrum  
52 beta-lactamase (ESBL) producing *E. coli* as part of the COMBAT study, which investigated the  
53 acquisition of ESBL-producing Enterobacteriaceae (ESBL-E) during international travel (15). This  
54 isolate, OPT1704<sup>T</sup>, was further characterized in detail.

55 The strain was isolated from a human faecal sample provided immediately after an individual's  
56 return from a one-month journey to several Asian countries. No ESBL-E were detected in a faecal  
57 sample collected immediately before departure, suggesting the ESBL gene, and possibly strain  
58 OPT1704<sup>T</sup>, were acquired during travel. The traveller reported diarrhoea during travel but no  
59 antibiotic usage. No ESBL-E were isolated in follow-up faecal samples, suggesting loss of the  
60 OPT1704<sup>T</sup> strain or the ESBL gene within one month after return from travel.

61

## 62 Genome Features

63 The whole-genome sequence of strain OPT1704<sup>T</sup> was determined using a combination of the  
64 Illumina HiSeq and Oxford Nanopore Technologies (ONT) sequencing platforms. The Illumina  
65 sequencing run yielded a total of  $6.3 \times 10^6$  paired-end reads, with a mean read length of 151 bp.  
66 Illumina reads were downsampled using seqtk (version 1.3-r106, <https://github.com/lh3/seqtk>) to  
67 provide a theoretical coverage depth of 100X with the assumption that the OPT1704<sup>T</sup> has a genome  
68 size of approximately  $5 \times 10^6$  bp. The ONT sequencing run yielded a total of  $2.5 \times 10^4$  reads, with a  
69 mean read length of 9078 bp before filtering. ONT reads were filtered on length and on read identity  
70 using Filtrlong (version 0.2.0, <https://github.com/rrwick/Filtrlong>) with Illumina reads as a reference,  
71 leaving  $1.5 \times 10^4$  reads with a mean length of 12580 bp. This provided a theoretical coverage depth of

72 ~38X of ONT reads. The combined assembly using Unicycler (version 0.4.6 (16)) of Illumina and  
73 Nanopore reads resulted in a completely assembled genome, consisting of one circular chromosome  
74 and one circular plasmid. The GC content of the complete OPT1704<sup>T</sup> genome was 50.6%.

75 Putative resistance and virulence genes were predicted from the draft genome using ABRicate with  
76 the CARD (17) and VFDB (18) databases. OPT1704<sup>T</sup> harbours 6 resistance genes on its Incl plasmid,  
77 associated with reduced susceptibility to fluoroquinolones (*qnrS1*), aminoglycosides (*aph(6)-Id* &  
78 *aph(3'')-Ib*), cephalosporins (*blaCTX-M-14*), trimethoprim (*dfrA14*) and sulphonamides (*sul2*),  
79 corresponding with its reduced susceptibility to fluoroquinolones (norfloxacin, MIC: 2 mg/L and  
80 ciprofloxacin, MIC: 0.5 mg/L), cephalosporins (cefuroxime, MIC: >32 mg/L and cefotaxime, MIC: 4  
81 mg/L) and trimethoprim-sulfamethoxazole (MIC: >8 mg/L), assessed using VITEK2 (BioMérieux).  
82 However, strain OPT1704<sup>T</sup> was susceptible to tobramycin (MIC: ≤1 mg/L) and gentamicin (MIC: ≤1  
83 mg/L) despite presence of aminoglycoside resistance genes. Furthermore, several putative virulence  
84 genes were predicted from the genome sequence associated with siderophore function (*chuX*, *ent5*,  
85 *fepABD*), fimbriae (*fimBCDGI*), a type II secretion system (*gspGHI*) and capsular polysaccharide  
86 biogenesis (*kpsD*). These predicted virulence genes, when present in *Escherichia coli*, are not  
87 typically associated with a specific clinical syndrome such as diarrhoeal disease.

## 88 **Physiology and Chemotaxonomy**

89 Strain OPT1704<sup>T</sup> formed circular, grey-white colonies on a Columbia sheep (COS) blood agar plate.  
90 Individual cells were observed under a light microscope and were rod-shaped and approximately 1  
91 by 2 µm in size. The strain was shown to be Gram-negative, non-motile, oxidase-negative and  
92 catalase-positive. The strain was capable to grow in the absence of oxygen. On COS blood plates, it  
93 showed growth in the temperature range of 20-42 °C. The strain was also able to grow in NaCl  
94 concentrations ranging from 0% to 6% in lysogeny broth. MALDI-TOF (Bruker) and VITEK2  
95 (BioMérieux) systems both identified OPT1704<sup>T</sup> as *E. coli* with high confidence scores (score>2 for

96 MALDI-TOF and “Excellent identification” for VITEK2). Comparison of the output of the VITEK2  
97 biochemical test with published biochemical reactions of other *Escherichia* species revealed that *E.*  
98 *ruysiae* sp. nov. str. OPT1704<sup>T</sup> is distinct from other *Escherichia* species based on a biochemical  
99 profile (table 1) (2–4,19). One biochemical reaction, lysine decarboxylation, cannot be performed by  
100 strain OPT1704<sup>T</sup>, but can be performed by all other *Escherichia* species. This reaction is typically  
101 mediated by the *cadA* gene (20), which is missing in OPT1704<sup>T</sup> but present in other *Escherichia*.

102

### 103 **16S rRNA and whole-genome phylogeny**

104 Next, we calculated 16S rRNA sequence similarities, ANI values and digital DNA:DNA hybridisation  
105 (dDDH) values between OPT1704<sup>T</sup> and type strains of the four other *Escherichia* species,  
106 representative genomes of the other three *Escherichia* cryptic clades, and *S. enterica* serovar  
107 Typhimurium (table 2). Representative genomes for the *Escherichia* cryptic clades I, II, III and VI were  
108 selected from Enterobase (21), using the genomes with the highest contiguity. Clades VII and VIII in  
109 Enterobase only consisted of a single strain and were not used in further analyses. We used three  
110 separate tools to calculate average nucleotide identity (ANI) (fastANI (22), OrthoANIu (23) and ANI  
111 calculator from Enveomics (24)) and the DSMZ Genome-to-Genome Distance Calculator to calculate  
112 digital DNA:DNA hybridisation (dDDH) (25). 16S rRNA genes were extracted from whole genomes  
113 using barrnap (version 0.9, <https://github.com/tseemann/barrnap>) and similarity was assessed using  
114 snp-dists (version 0.6, <https://github.com/tseemann/snp-dists>).

115 OPT1704<sup>T</sup> showed 98.7-98.9% 16S rRNA sequence similarity to *E. coli* ATCC 11775<sup>T</sup>, *E. fergusonii*  
116 ATCC 35469<sup>T</sup> and *E. marmotae* HT073016<sup>T</sup>, which would not warrant assignment to a novel species  
117 based on the current threshold for species delineation (less than 98.7% sequence similarity).  
118 However, the threshold for species delineation on the basis of 16S rRNA sequence has changed  
119 often and thresholds of up to 99% sequence similarity have been proposed previously (Kim 2014). In

120 contrast, ANI analysis and dDDH did support assignment of OPT1704<sup>T</sup> to a novel species, together  
121 with the representative strain of *Escherichia* cryptic clade III (table 2). The analyses also confirmed  
122 that OPT1704<sup>T</sup> falls within the *Escherichia* genus. This novel species, encompassing both *Escherichia*  
123 cryptic clades III and IV, was assigned *E. ruysiae* sp. nov. with OPT1704<sup>T</sup> as the proposed type strain.

124 To gain a better understanding of the *Escherichia* genus, we produced two phylogenies, based on  
125 16S rRNA sequence (Fig. 1) and on an alignment of 682 core genes (Fig. 2). In short, rRNA genes were  
126 predicted from whole genomes using barrnap (version 0.9, <https://github.com/tseemann/barrnap>)  
127 and a tree was generated using FastTree (version 2.1.10 (26)). For the core gene alignment, genomes  
128 were first annotated with Prokka (version 1.14.0 (27)) and a core gene alignment was produced  
129 using Roary (version 3.12.0 (28)) and MAFFT (version 7.307 (29)). The phylogeny was inferred using a  
130 generalised time reversible model using base frequencies from the SNP alignment and free rate  
131 heterogeneity (GTR+F+R4 model) in IQ-tree (version 1.6.6 (30)), as advised by ModelFinder (31).  
132 Phylogenies were rooted on the *Salmonella enterica* serovar Typhimurium str. LT2<sup>T</sup> genome. Both  
133 phylogenies showed that strain OPT1704<sup>T</sup> clusters closely with the strain MOD1-EC7259 from  
134 *Escherichia* cryptic clade III, and away from the current *Escherichia* species.

135 Chun et al. (32) proposed that strains with >95-96% genome-wide ANI between each other should  
136 be assigned to the same species. If cryptic clades III and clade IV would share >95-96% ANI, this  
137 would mean both clades should be assigned to the same novel species, *E. ruysiae*. To assess this for  
138 a larger number of strains than the type strains presented in table 2, we downloaded all available  
139 WGS from clade III and clade IV strains from Enterobase and compared ANI between all genomes  
140 using fastANI (version 1.1 (22)). This analysis revealed that within 32 clade III genomes, the median  
141 ANI is 98.6% (range: 97.7%-99.9%), while within 31 clade IV genomes, the median ANI is 98.9%  
142 (range: 98.6%-99.9%). Between clade III and clade IV genomes, the median ANI is 96.6% (range  
143 96.2%-96.8%). This suggests clades III and IV should be assigned to the same novel species, *E. ruysiae*  
144 sp. nov.

145 Currently, no IJSEM guidelines exist for the delineation of subspecies based on genomic data.  
146 However, *E. ruysiae* could potentially be delineated further into two subspecies (representing the  
147 current clades III and IV, respectively) in the future, after a type strain for cryptic clade III has been  
148 identified.

149

## 150 **Description of *E. ruysiae* sp. nov.**

151 *Escherichia ruysiae* (ruy'si.æ N.L. fem. n. after Anna Charlotte Ruys, professor of microbiology at the  
152 University of Amsterdam from 1940 to 1969). Cells are Gram-negative, facultatively anaerobic, non-  
153 sporulating, non-motile rods with a size of approximately 1 by 2 µm. Colonies are circular, convex,  
154 grey-white and semi-transparent when grown overnight at 37 °C on COS sheep blood agar plates.  
155 The species is catalase-positive and oxidase-negative and grows at temperatures between 20 and 42  
156 °C and NaCl concentrations between 0% and 6% w/v. In the VITEK2 GN biochemical test set it yields  
157 a positive result for Beta-Galactosidase, D-Glucose, D-Maltose, D-Mannitol, D-Mannose, D-Sorbitol,  
158 D-Trehalose, Saccharose/Sucrose, D-Tagatose, Gamma-Glutamyl-Transferase, Fermentation Glucose,  
159 Tyrosine Arylamidase, Succinate Alkalinisation, Alpha-Galactosidase, Ornithine Decarboxylase,  
160 Courmarate, Beta-Glucuronidase, O/129 Resistance (Comp.Vibrio.) and Ellman and negative for Ala-  
161 Phe-Pro-Arylamidase, Adonitol, L-Pyrrolydonyl-Arylamidase, L-Arabitol, D-Cellobiose, H<sub>2</sub>S  
162 Production, Beta-N-Acetyl Glucosaminidase, Glutamyl Arylamidase Pna, Beta-Glucosidase, Beta-  
163 Xylosidase, Beta-Alanine Arylamidase Pna, L-Proline Arylamidase, Lipase, Palatinose, Urease, Citrate  
164 (Sodium), Malonate, 5-Keto-D-Gluconate, L-Lactate Alkalinisation, Alpha-Glucosidase, Beta-N-Acetyl-  
165 Galactosaminidase, Phosphatase, Glycine Arylamidase, Lysine Decarboxylase, L-Histidine  
166 Assimilation, Glu-Gly-Arg-Arylamidase, L-Malate Assimilation and L-Lactate Assimilation.  
167

168 The 16S rRNA sequence is deposited in ENA under accession LR745848. Raw Illumina and Nanopore  
169 whole-genome sequencing data, as well as the complete genome assembly are deposited under  
170 project PRJEB34275.

171

## 172 **AUTHOR STATEMENTS**

### 173 *Funding information*

174 The COMBAT study was funded by Netherlands Organization for Health, Research and Development  
175 (ZonMw; 50-51700-98-120) and EU-H2020 programme (COMPARE, 643476).

### 176 *Acknowledgements*

177 The authors would like to thank Rob Weijts and Patricia Brinke for their help in phenotypic  
178 characterization of type strain OPT1704<sup>T</sup> of *Escherichia ruysiae* sp. nov. and Arie van der Ende for the  
179 helpful discussions. We thank SURFsara ([www.surfsara.nl](http://www.surfsara.nl)) for the support in using the Lisa Compute  
180 Cluster.

### 181 *Ethical statement*

182 Not required.

### 183 *Conflicts of interest*

184 None.

185

## 186 **ABBREVIATIONS**

187 ONT: Oxford Nanopore Technologies



188 MIC: Minimum Inhibitory Concentration

189 COS: Columbia agar + Sheep blood

190 dDDH: digital DNA:DNA hybridisation

191 ANI: Average Nucleotide Identity

192 SNP: Single Nucleotide Polymorphism

193

## 194 REFERENCES

- 195 1. Castellani A, Chambers AJ. Manual of tropical medicine. William Wood; 1919.
- 196 2. Farmer JJ, Fanning GR, Davis BR, O'Hara CM, Riddle C, Hickman-Brenner FW, et al. *Escherichia*  
197 *fergusonii* and *Enterobacter taylorae*, two new species of Enterobacteriaceae isolated from  
198 clinical specimens. *J Clin Microbiol.* 1985 Jan 1;21(1):77.
- 199 3. Huys G, Cnockaert M, Janda JM, Swings J. *Escherichia albertii* sp. nov., a diarrhoeagenic species  
200 isolated from stool specimens of Bangladeshi children. *Int J Syst Evol Microbiol.*  
201 2003;53(3):807–10.
- 202 4. Liu S, Jin D, Lan R, Wang Y, Meng Q, Dai H, et al. *Escherichia marmotae* sp. nov., isolated from  
203 faeces of *Marmota himalayana*. *Int J Syst Evol Microbiol.* 2015;65(7):2130–4.
- 204 5. Alnajar S, Gupta RS. Phylogenomics and comparative genomic studies delineate six main clades  
205 within the family Enterobacteriaceae and support the reclassification of several polyphyletic  
206 members of the family. *Infect Genet Evol.* 2017;54:108–127.
- 207 6. Priest FG, Barker M. Gram-negative bacteria associated with brewery yeasts: reclassification of  
208 *Obesumbacterium proteus* biogroup 2 as *Shimwellia pseudoproteus* gen. nov., sp. nov., and  
209 transfer of *Escherichia blattae* to *Shimwellia blattae* comb. nov. *Int J Syst Evol Microbiol.*  
210 2010;60(4):828–833.

- 211 7. Tamura K, Sakazaki R, Kosako Y, Yoshizaki E. *Leclercia adecarboxylata* Gen. Nov., Comb. Nov.,  
212 formerly known as *Escherichia adecarboxylata*. *Curr Microbiol.* 1986;13(4):179–184.
- 213 8. Hata H, Natori T, Mizuno T, Kanazawa I, Eldesouky I, Hayashi M, et al. Phylogenetics of family  
214 Enterobacteriaceae and proposal to reclassify *Escherichia hermannii* and *Salmonella*  
215 *subterranea* as *Atlantibacter hermannii* and *Atlantibacter subterranea* gen. nov., comb. nov.  
216 *Microbiol Immunol.* 2016;60(5):303–311.
- 217 9. Russo TA, Johnson JR. Medical and economic impact of extraintestinal infections due to  
218 *Escherichia coli*: focus on an increasingly important endemic problem. *Microbes Infect.* 2003  
219 Apr 1;5(5):449–56.
- 220 10. Savini V, Catavittello C, Talia M, Manna A, Pompetti F, Favaro M, et al. Multidrug-Resistant  
221 *Escherichia fergusonii*: a Case of Acute Cystitis. *J Clin Microbiol.* 2008 Apr 1;46(4):1551.
- 222 11. Ooka T, Seto K, Kawano K, Kobayashi H, Etoh Y, Ichihara S, et al. Clinical significance of  
223 *Escherichia albertii*. *Emerg Infect Dis.* 2012 Mar;18(3):488–92.
- 224 12. Liu S, Feng J, Pu J, Xu X, Lu S, Yang J, et al. Genomic and molecular characterisation of  
225 *Escherichia marmotae* from wild rodents in Qinghai-Tibet plateau as a potential pathogen. *Sci*  
226 *Rep.* 2019;9(1):1–9.
- 227 13. Gangiredla J, Mammel MK, Barnaba TJ, Tartera C, Gebru ST, Patel IR, et al. Draft Genome  
228 Sequences of *Escherichia albertii*, *Escherichia fergusonii*, and Strains Belonging to Six Cryptic  
229 Lineages of *Escherichia* spp. *Genome Announc.* 2018 May 3;6(18):e00271-18.
- 230 14. Walk S. The “Cryptic” *Escherichia*. *EcoSal Plus* [Internet]. 2015; Available from:  
231 <https://www.asmscience.org/content/journal/ecosalplus/10.1128/ecosalplus.ESP-0002-2015>
- 232 15. Arcilla MS, van Hattem JM, Haverkate MR, Bootsma MCJ, van Genderen PJJ, Goorhuis A, et al.  
233 Import and spread of extended-spectrum  $\beta$ -lactamase-producing Enterobacteriaceae by  
234 international travellers (COMBAT study): a prospective, multicentre cohort study. *Lancet Infect*  
235 *Dis.* 2017 Jan 1;17(1):78–85.
- 236 16. Wick RR, Judd LM, Gorrie CL, Holt KE. Unicycler: Resolving bacterial genome assemblies from  
237 short and long sequencing reads. *PLOS Comput Biol.* 2017 Jun 8;13(6):e1005595.
- 238 17. McArthur AG, Waglechner N, Nizam F, Yan A, Azad MA, Baylay AJ, et al. The Comprehensive  
239 Antibiotic Resistance Database. *Antimicrob Agents Chemother.* 2013 Jul;57(7):3348–57.

- 240 18. Chen L. VFDB: a reference database for bacterial virulence factors. *Nucleic Acids Res.* 2004 Dec  
241 17;33(Database issue):D325–8.
- 242 19. Abbott SL, O'Connor J, Robin T, Zimmer BL, Janda JM. Biochemical properties of a newly  
243 described *Escherichia* species, *Escherichia albertii*. *J Clin Microbiol.* 2003;41(10):4852–4854.
- 244 20. Snider J, Houry WA. MoxR AAA+ ATPases: a novel family of molecular chaperones? *J Struct*  
245 *Biol.* 2006;156(1):200–209.
- 246 21. Zhou Z, Alikhan N-F, Mohamed K, Fan Y, Achtman M, Brown D, et al. The Enterobase user's  
247 guide, with case studies on *Salmonella* transmissions, *Yersinia pestis* phylogeny, and  
248 *Escherichia* core genomic diversity. *Genome Res.* 2020;30(1):138–152.
- 249 22. Jain C, Rodriguez-R LM, Phillippy AM, Konstantinidis KT, Aluru S. High throughput ANI analysis  
250 of 90K prokaryotic genomes reveals clear species boundaries. *Nat Commun.* 2018 Nov  
251 30;9(1):5114.
- 252 23. Yoon S-H, Ha S-M, Lim J, Kwon S, Chun J. A large-scale evaluation of algorithms to calculate  
253 average nucleotide identity. *Antonie Van Leeuwenhoek.* 2017 Oct;110(10):1281–6.
- 254 24. Rodriguez-R LM, Konstantinidis KT. The enveomics collection: a toolbox for specialized analyses  
255 of microbial genomes and metagenomes. *PeerJ Prepr.* 2016 Mar;4:e1900v1.
- 256 25. Meier-Kolthoff JP, Auch AF, Klenk H-P, Göker M. Genome sequence-based species delimitation  
257 with confidence intervals and improved distance functions. *BMC Bioinformatics.* 2013  
258 Feb;14(1):60.
- 259 26. Price MN, Dehal PS, Arkin AP. FastTree 2—approximately maximum-likelihood trees for large  
260 alignments. *PloS One.* 2010;5(3).
- 261 27. Seemann T. Prokka: rapid prokaryotic genome annotation. *Bioinformatics.* 2014 Jul  
262 15;30(14):2068–9.
- 263 28. Page AJ, Cummins CA, Hunt M, Wong VK, Reuter S, Holden MTG, et al. Roary: rapid large-scale  
264 prokaryote pan genome analysis. *Bioinformatics.* 2015 Nov 15;31(22):3691–3.
- 265 29. Katoh K, Standley DM. MAFFT multiple sequence alignment software version 7: improvements  
266 in performance and usability. *Mol Biol Evol.* 2013;30(4):772–780.

- 267 30. Nguyen L-T, Schmidt HA, von Haeseler A, Minh BQ. IQ-TREE: A Fast and Effective Stochastic  
268 Algorithm for Estimating Maximum-Likelihood Phylogenies. *Mol Biol Evol.* 2014 Nov  
269 3;32(1):268–74.
- 270 31. Kalyaanamoorthy S, Minh BQ, Wong TK, von Haeseler A, Jermiin LS. ModelFinder: fast model  
271 selection for accurate phylogenetic estimates. *Nat Methods.* 2017;14(6):587.
- 272 32. Chun J, Oren A, Ventosa A, Christensen H, Arahal DR, da Costa MS, et al. Proposed minimal  
273 standards for the use of genome data for the taxonomy of prokaryotes. *Int J Syst Evol*  
274 *Microbiol.* 2018 Jan 1;68(1):461–6.

275

276

277 **FIGURES AND TABLES**

278 **Table 1.** Comparison of biochemical markers which differentiate *E. ruysiae* sp. nov. from other

279 *Escherichia* species. + and – indicate that ≥85% of tested strains is positive or negative for that

280 biochemical marker, respectively. Data for *E. albertii*, *E. coli*, *E. fergusonii* and *E. marmotae*

281 summarised from literature (Abbott 2003, Huys 2003, Farmer 1985, Liu 2015).

|                         | <i>E. ruysiae</i> | <i>E. albertii</i> | <i>E. coli</i> | <i>E. fergusonii</i> | <i>E. marmotae</i> |
|-------------------------|-------------------|--------------------|----------------|----------------------|--------------------|
| ONPG                    | +                 | +                  | +              | +                    | ?                  |
| Lysine decarboxylase    | -                 | +                  | +              | +                    | +                  |
| Ornithine decarboxylase | +                 | +                  | +*             | +                    | ?                  |
| Fermentation of:        |                   |                    |                |                      |                    |
| Adonitol                | -                 | ?                  | ?              | +                    | ?                  |
| d-Xylose                | -                 | ?                  | +              | +                    | +                  |
| Cellobiose              | -                 | ?                  | ?              | +                    | ?                  |
| d-Sorbitol              | +                 | ?                  | +              | ?                    | +                  |

282 \*50-85% of *E. coli* possess this biochemical property.

283

284 **Table 2.** Comparison of OPT1704<sup>T</sup> 16S rRNA and whole-genome sequence with type strains of *E.*  
 285 *albertii*, *E. coli*, *E. fergusonii*, *E. marmotae*, representative genomes of *Escherichia* cryptic clades I, II,  
 286 III and VI and *S. enterica* serovar Typhimurium. In bold are the values that warrant assignment of  
 287 OPT1704<sup>T</sup> to a novel species (<98.7% 16S rRNA sequence similarity, <95-96% ANI, <70% dDDH). ANI:  
 288 average nucleotide identity, dDDH: digital DNA:DNA hybridisation.

|                                                       | <i>E. ruysiae</i> sp. nov.       |                    |                      |                                        |             |
|-------------------------------------------------------|----------------------------------|--------------------|----------------------|----------------------------------------|-------------|
|                                                       | OPT1704 <sup>T</sup>             |                    |                      |                                        |             |
|                                                       | 16S rRNA sequence similarity (%) | ANI (%<br>fastANI) | ANI (%<br>OrthoANIu) | ANI (%<br>ANI calculator<br>Enveomics) | dDDH (%)    |
| <i>E. albertii</i><br>NBRC 107761 <sup>T</sup>        | <b>98.6</b>                      | <b>90.0</b>        | <b>90.0</b>          | <b>89.2</b>                            | <b>39.8</b> |
| <i>E. coli</i><br>ATCC 11775 <sup>T</sup>             | 98.7                             | <b>92.8</b>        | <b>92.4</b>          | <b>92.0</b>                            | <b>48.3</b> |
| <i>E. fergusonii</i><br>ATCC 35469 <sup>T</sup>       | 98.9                             | <b>89.4</b>        | <b>88.2</b>          | <b>89.7</b>                            | <b>36.7</b> |
| <i>E. marmotae</i><br>HT073016 <sup>T</sup>           | 98.9                             | <b>92.2</b>        | <b>92.2</b>          | <b>91.4</b>                            | <b>47.1</b> |
| <i>S. enterica</i><br>Typhimurium<br>LT2 <sup>T</sup> | <b>97.5</b>                      | <b>82.1</b>        | <b>80.7</b>          | <b>81.8</b>                            | <b>24.0</b> |
| <i>Escherichia</i><br>cryptic clade I<br>89-3506      | 99.0                             | <b>92.5</b>        | <b>92.1</b>          | <b>91.8</b>                            | <b>47.8</b> |
| <i>Escherichia</i><br>cryptic clade II<br>MOD1-EC7253 | 99.2                             | <b>92.0</b>        | <b>91.7</b>          | <b>91.0</b>                            | <b>45.5</b> |
| <i>Escherichia</i><br>cryptic clade III<br>E4694      | 99.7                             | 96.6               | 96.5                 | 96.3                                   | 70.8        |
| <i>Escherichia</i><br>cryptic clade VI<br>UHCL_3L     | <b>98.4</b>                      | <b>91.6</b>        | <b>91.7</b>          | <b>91.3</b>                            | <b>45.9</b> |

289

290 **Figure 1.** 16S phylogeny of *E. ruysiae* str. OPT1704<sup>T</sup> with type strains of other *Escherichia* spp., other

291 *Escherichia* cryptic clades and *Salmonella enterica* serovar Typhimurium as outgroup. Numbers

292 indicate bootstraps on a scale of 0 to 1. Phylogeny available at

293 <https://itol.embl.de/tree/14511722611197561579189697>

294

295

296 **Figure 2.** Phylogeny based on 682 concatenated core genes including *E. ruysiae* OPT1704T with type  
297 strains of other *Escherichia* spp., other *Escherichia* cryptic clades and *Salmonella enterica* serovar  
298 Typhimurium as outgroup. Numbers indicate bootstraps on a scale of 0 to 100. Phylogeny available  
299 at <https://itol.embl.de/tree/14511722711358151579253758>



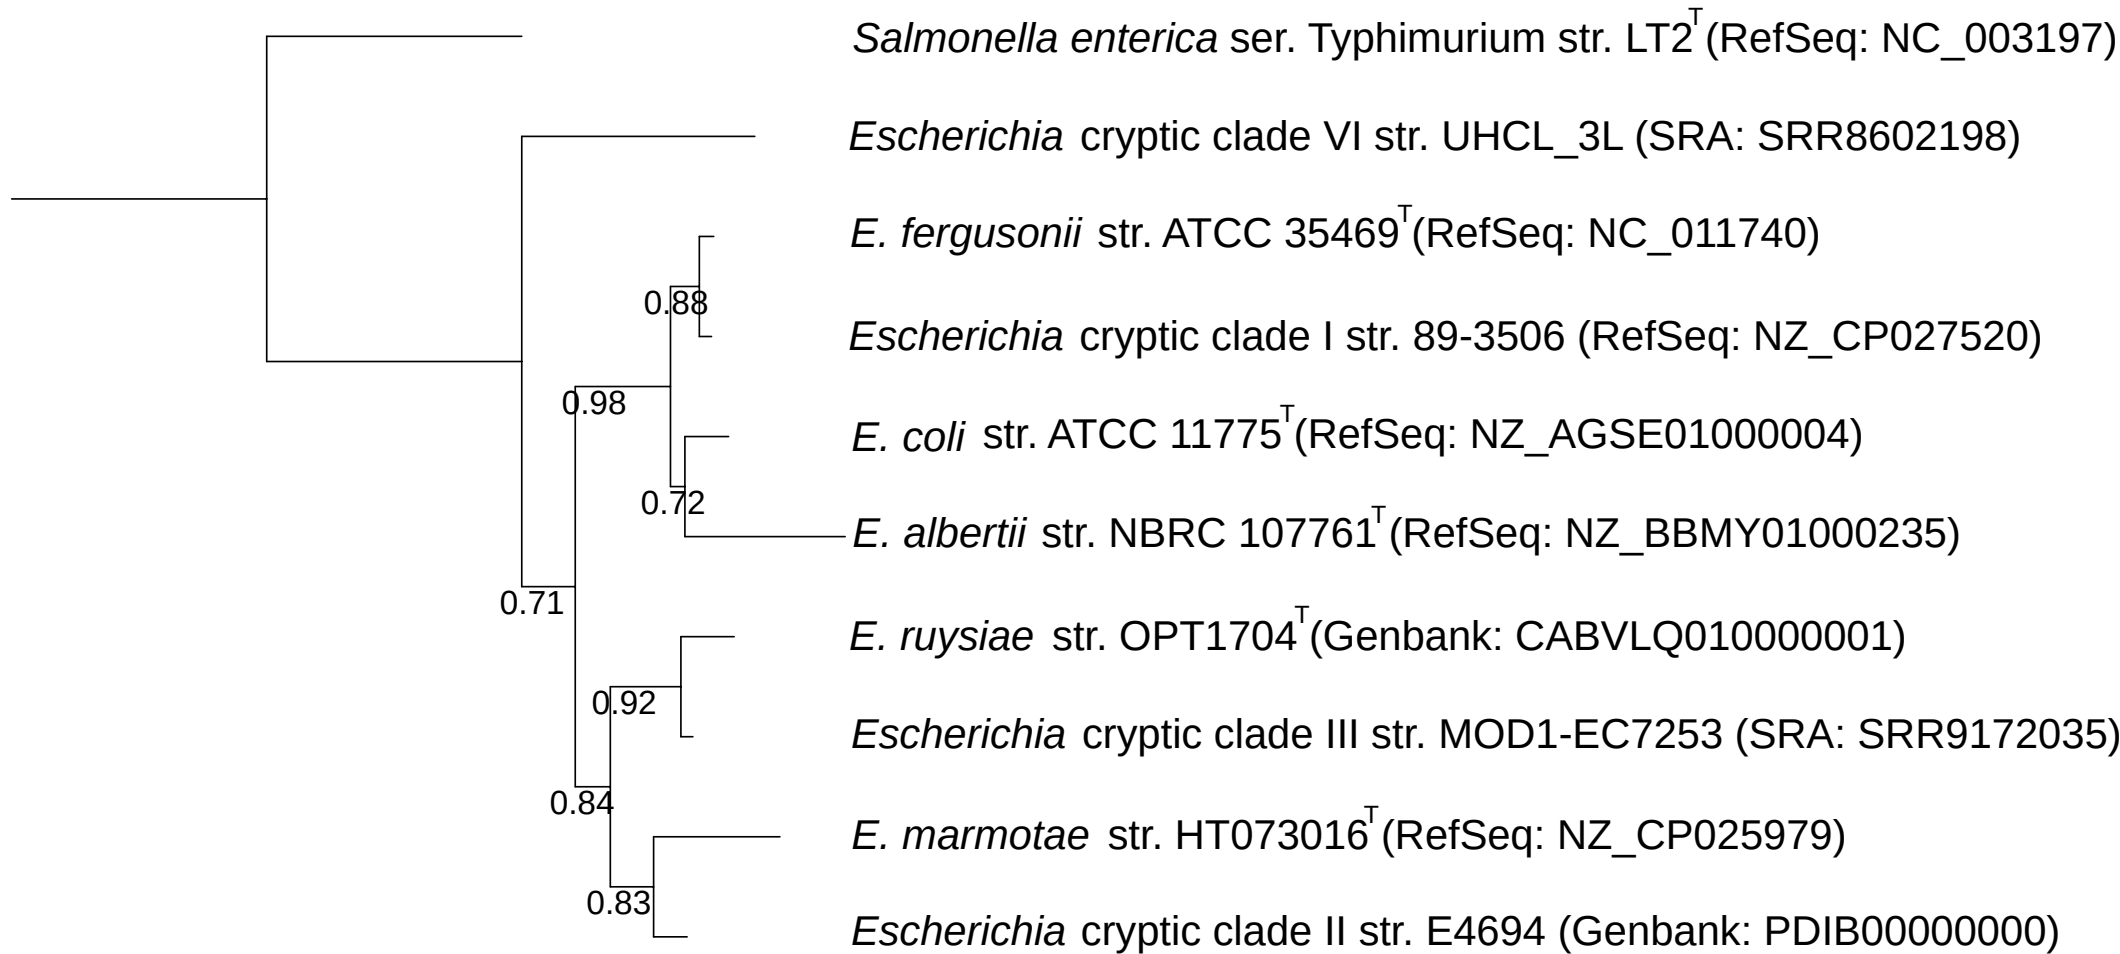

Tree scale: 0.1

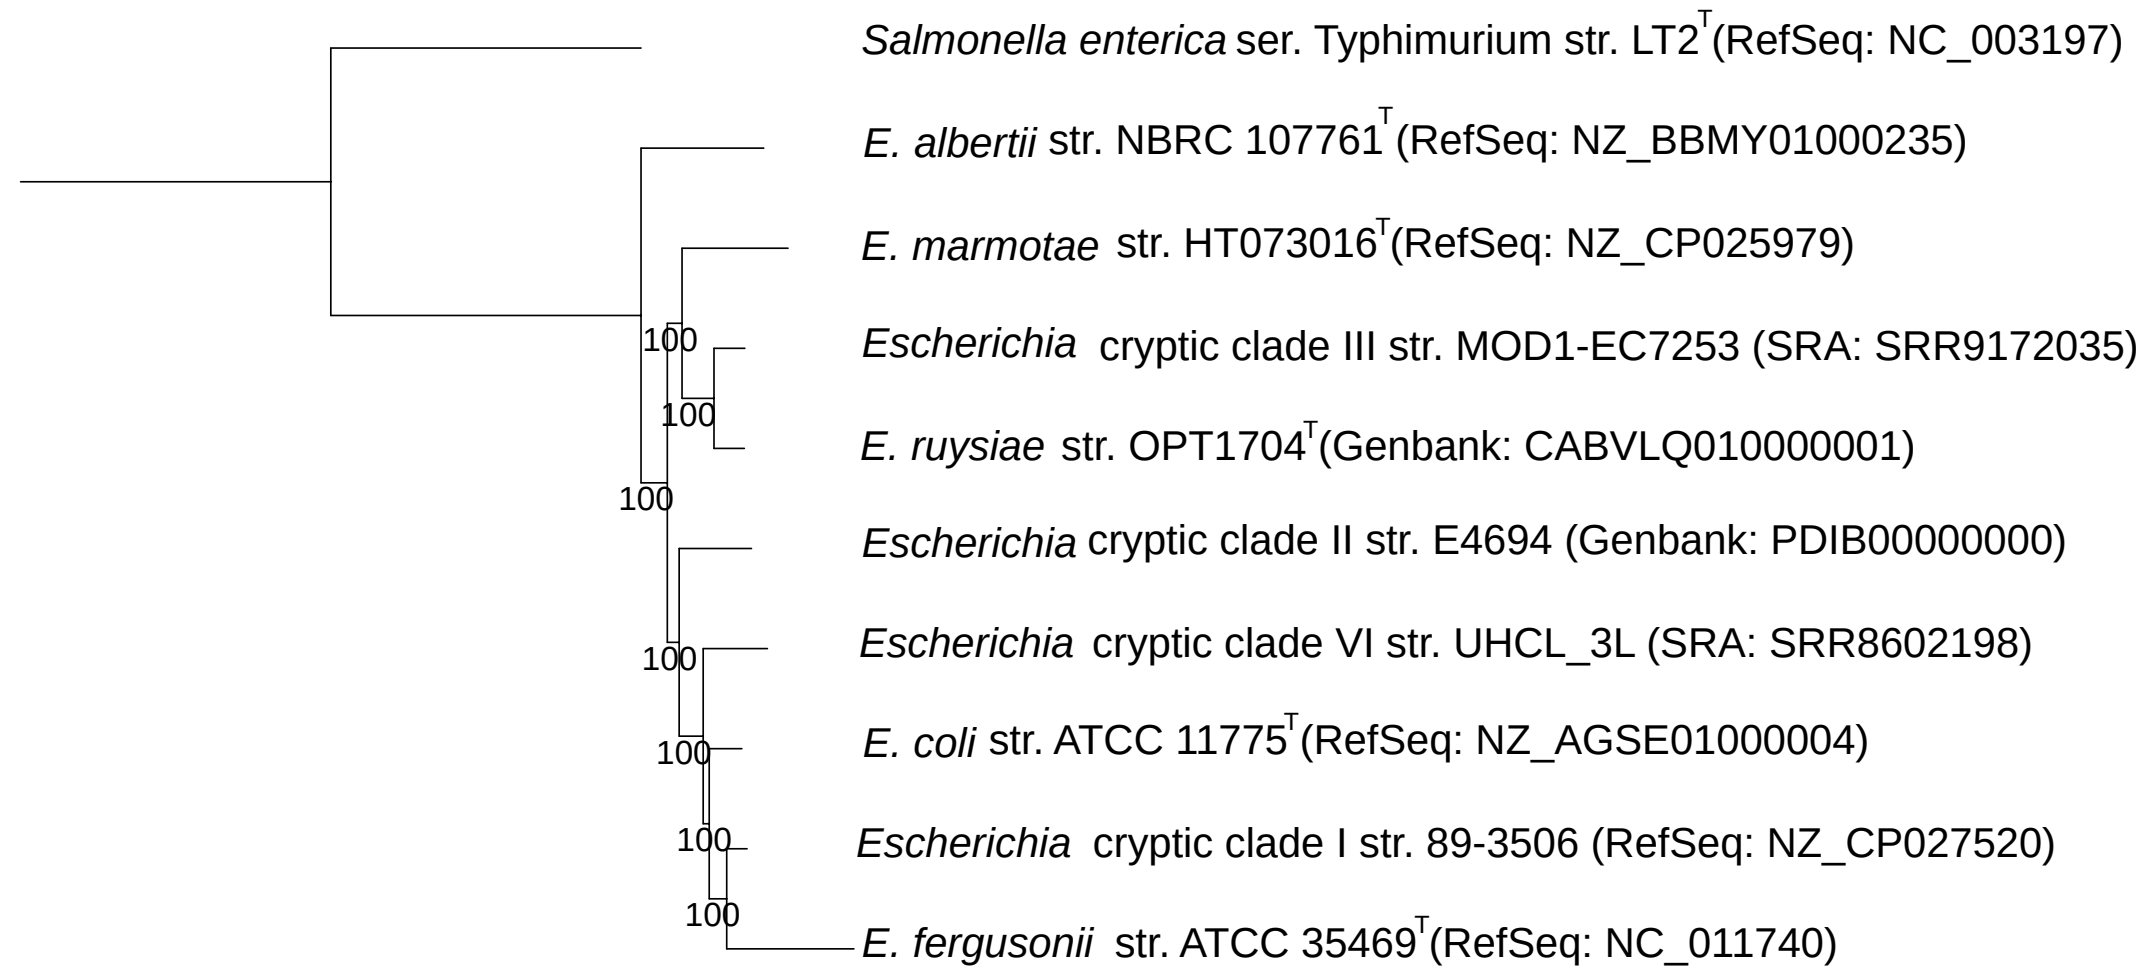

Source: https://www.biorxiv.org/content/10.1101/781724v3.full.pdf
